# Supplementary material for: Synthesis of Graphene-like Materials from Acetylene Black, Activated Carbon, and Ketjenblack via Separated Microwave Electric and Magnetic Field Heating
Source: MDPI journal article supplement (doi:10.3390/ma16103723), 2023-05-14
Supplement: s1 [file s1]

# Supplementary Material

## Synthesis of Graphene-Like Materials from Acetylene Black, Activated Carbon, and Ketjenblack via Separated Microwave Electric and Magnetic Field Heating

Takeshi Miyata <sup>1,\*</sup>, Syun Gohda <sup>2</sup>, Akio Oshita <sup>1</sup>, Hironobu Ono <sup>2</sup> and Keiichiro Kashimura <sup>1,\*</sup>

<sup>1</sup> Faculty of Engineering, Chubu University, 1200 Matsumoto-cho, Kasugai 487-8501, Aichi, Japan

<sup>2</sup> Nippon Shokubai Co., Ltd., Nishi-Otabicho, Suita 564-0034, Osaka, Japan

\* Correspondence: tk20016-5404@sti.chubu.ac.jp (T.M.); kashimura@isc.chubu.ac.jp (K.K.); Tel.: +81-568-51-8420; Fax: +81-568-51-8421

**Table S1.** Selected peak shifts from the Raman spectrum analysis of each carbon material.

| <b>ASB</b> | D/ cm <sup>-1</sup> | G/ cm <sup>-1</sup> | G'/ cm <sup>-1</sup> |
|------------|---------------------|---------------------|----------------------|
| Before     | 1325                | 1575                | 2665                 |
| CH         | 1353                | 1607                | 2680                 |
| E700       | 1345                | 1590                | 2695                 |
| E800       | 1345                | 1583                | 2690                 |
| E900       | 1350                | 1585                | 2697                 |
| E1000      | 1353                | 1583                | 2702                 |
| H700       | 1345                | 1585                | 2690                 |
| H800       | 1347                | 1580                | 2695                 |
| H900       | 1352                | 1583                | 2700                 |
| H1000      | 1347                | 1583                | 2695                 |

| <b>ACT(K)</b> | D/ cm <sup>-1</sup> | G/ cm <sup>-1</sup> | G'/ cm <sup>-1</sup> |
|---------------|---------------------|---------------------|----------------------|
| Before        | 1345                | 1605                | broad                |
| CH            | 1362                | 1615                | 2685                 |
| E700          | 1343                | 1588                | 2683                 |
| E800          | 1345                | 1598                | 2685                 |
| E900          | 1345                | 1592                | 2688                 |
| E1000         | 1340                | 1588                | 2685                 |
| H700          | 1337                | 1592                | 2685                 |
| H800          | 1335                | 1592                | 2685                 |
| H900          | 1340                | 1590                | 2690                 |
| H1000         | 1338                | 1584                | 2693                 |

| <b>ACT(O)</b> | D/ cm <sup>-1</sup> | G/ cm <sup>-1</sup> | G'/ cm <sup>-1</sup> |
|---------------|---------------------|---------------------|----------------------|
| Before        | 1350                | 1592                | broad                |
| CH            | 1365                | 1615                | 2680                 |
| E700          | 1342                | 1598                | 2665                 |
| E800          | 1343                | 1599                | 2670                 |
| E900          | 1340                | 1600                | 2670                 |
| E1000         | 1347                | 1600                | 2675                 |
| H700          | 1345                | 1598                | 2680                 |
| H800          | 1348                | 1595                | 2680                 |
| H900          | 1340                | 1595                | 2675                 |
| H1000         | 1340                | 1588                | 2680                 |

| <b>KTB</b> | D/ cm <sup>-1</sup> | G/ cm <sup>-1</sup> | G'/ cm <sup>-1</sup> |
|------------|---------------------|---------------------|----------------------|
| Before     | 1333                | 1592                | 2670                 |
| CH         | 1352                | 1607                | 2670                 |
| E700       | 1342                | 1595                | 2680                 |
| E800       | 1340                | 1598                | 2675                 |
| E900       | 1340                | 1598                | 2670                 |
| E1000      | 1343                | 1593                | 2670                 |
| H700       | 1345                | 1597                | 2680                 |
| H800       | 1340                | 1595                | 2675                 |
| H900       | 1336                | 1595                | 2675                 |
| H1000      | 1339                | 1585                | 2675                 |

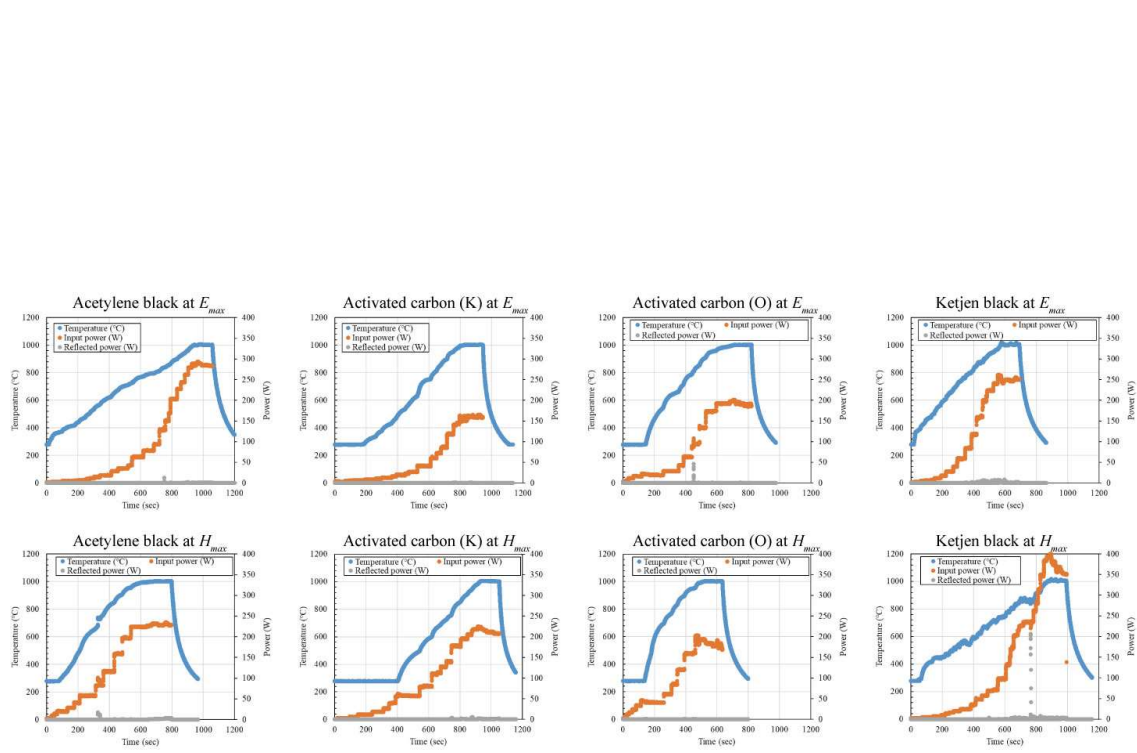

**Figure S1.** Temporal profiles of the temperature and microwave input/reflected power of each carbon material.

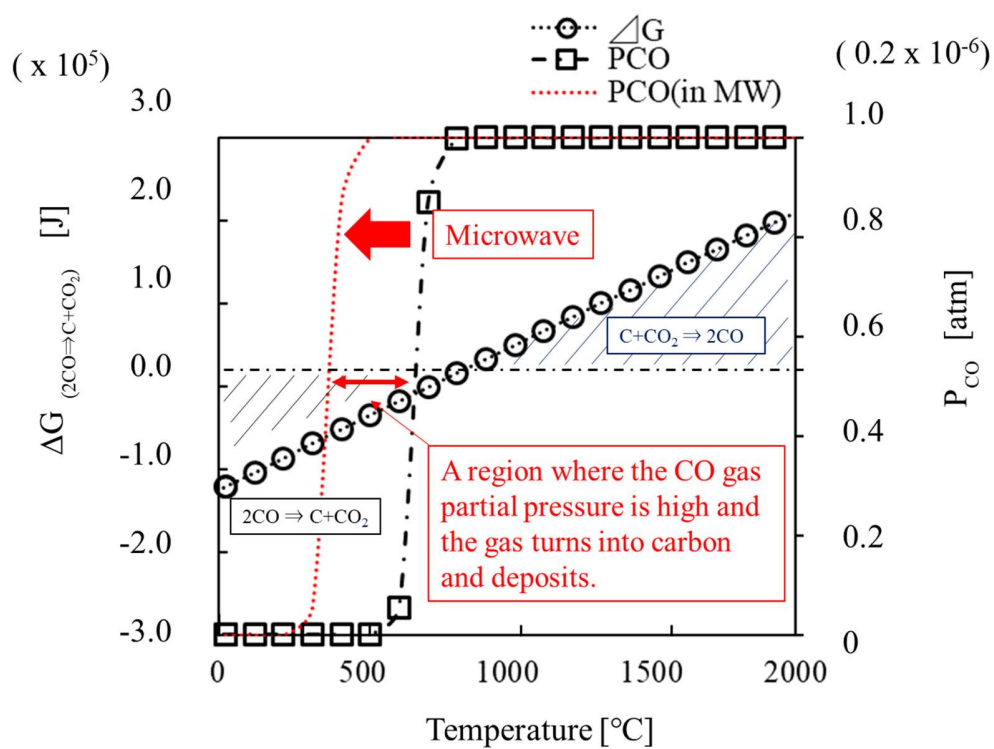

**Figure S2.** Temperature dependence of the Gibbs energy change of reaction:  $2CO \rightleftharpoons C + CO_2$  (where  $P_{CO} = 4.0 \times 10^{-4}$  atm,  $P_{CO_2} = 4.0 \times 10^{-8}$  atm). Low-temperature CO gas is deposited as carbon. Where,  $\Delta G$  indicates the Gibbs free energy change.
